# Supplementary material for: High-resolution array CGH clarifies events occurring on 8p in carcinogenesis
Source: PubMed Central journal article supplement (PMC2576333; doi:10.1186/1471-2407-8-288), 2008-10-07
Supplement: 1471-2407-8-288-S1.pdf [file 1471-2407-8-288-S1.pdf]

**Table 1:** Cancer cell lines used

| Cell Line            | Tissue     | Source <sup>3</sup> | Medium <sup>4</sup> | Reference                  |
|----------------------|------------|---------------------|---------------------|----------------------------|
| BT-20                | Breast     | O'Hare              | DMEM/F12            | Lasfargues et al, 1958     |
| BT-474               | Breast     | O'Hare              | DMEM/F12            | Lasfargues et al, 1978     |
| CaMa-1               | Breast     | Chaffanet           | RPMI-1640           | Dobrynin et al, 1963       |
| DU4475               | Breast     | O'Hare              | RPMI-1640           | Langlois et al., 1979      |
| HCC1143              | Breast     | ATCC                | See ref             | Gazdar et al, 1998         |
| HCC1187              | Breast     | ATCC                | See ref             | Gazdar et al, 1998         |
| HCC1419              | Breast     | ATCC                | See ref             | Gazdar et al, 1998         |
| HCC1500              | Breast     | ATCC                | See ref             | Gazdar et al, 1998         |
| HCC1569              | Breast     | ATCC                | See ref             | Gazdar et al, 1998         |
| HCC1599              | Breast     | ATCC                | See ref             | Gazdar et al, 1998         |
| HCC1806              | Breast     | ATCC                | See ref             | Gazdar et al, 1998         |
| HCC1937 <sup>1</sup> | Breast     | ATCC                | See ref             | Gazdar et al, 1998         |
| HCC1954              | Breast     | ATCC                | See ref             | Gazdar et al, 1998         |
| HCC38                | Breast     | ATCC                | See ref             | Gazdar et al, 1998         |
| HCC70                | Breast     | ATCC                | See ref             | Gazdar et al, 1998         |
| HS578t               | Breast     | O'Hare              | DMEM/F12            | Hackett et al, 1977        |
| MCF-7                | Breast     | ATCC                | DMEM/F12            | Soule, et al. 1973         |
| MDA-MB-134           | Breast     | O'Hare              | DMEM/F12            | Cailleau, et al. 1974      |
| MDA-MB-175           | Breast     | O'Hare              | DMEM/F12            | Cailleau, et al. 1974      |
| MDA-MB-361           | Breast     | ATCC                | DMEM/F12            | Satya-Prakash, et al. 1981 |
| MDA-MB-415           | Breast     | O'Hare              | DMEM/F12            | Cailleau et al, 1978       |
| MDA-MB-453           | Breast     | ATCC                | DMEM/F12            | Cailleau et al, 1978       |
| MDA-MB-468           | Breast     | O'Hare              | DMEM/F12            | Cailleau, et al. 1978      |
| PMC42                | Breast     | O'Hare              | DMEM/F12            | Whitehead, et al. 1983     |
| SKBR-3               | Breast     | ATCC                | DMEM/F12            | Fogh and Trempe 1975       |
| SUM159               | Breast     | Orig                | See ref             | Flanagan et al, 1999       |
| SUM44                | Breast     | Orig                | See ref             | Mahacek et al, 1993        |
| SUM52                | Breast     | Orig                | See ref             | Ethier et al, 1996         |
| T47D                 | Breast     | ATCC                | DMEM/F12            | Keydar, et al. 1979        |
| UACC812              | Breast     | Sanger              | DMEM/F12            | Meltzer et al, 1991        |
| ZR-75-1              | Breast     | ATCC                | DMEM/F12            | Engel et al, 1978          |
| ZR-75-30             | Breast     | O'Hare              | RPMI-1640           | Engel et al, 1978          |
| Caov-3               | Ovarian    | Brenton             | DMEM/F12            |                            |
| PA-1                 | Ovarian    | Brenton             | DMEM/F12            | Zeuthen et al., 1980       |
| SK-OV-3              | Ovarian    | O'Hare              | McCoy's             | Fogh et al, 1977           |
| Capan-1 <sup>2</sup> | Pancreatic | ATCC                | RPMI-1640           | Fogh et al, 1977           |
| CF-PAC-1             | Pancreatic | Lemoine             | RPMI-1640           | Schoumacher, et al. 1990   |
| MIA PaCa-2           | Pancreatic | Lemoine             | DMEM/F12            | Yunis et al., 1977         |
| PancTu1              | Pancreatic | Lemoine             | RPMI-1640           | Moore, et al. 2001         |
| RWP-1                | Pancreatic | Lemoine             | RPMI-1640           | Dexter, et al. 1982        |
| Suit2                | Pancreatic | Lemoine             | RPMI-1640           | Iwamura, et al. 1987       |

<sup>1</sup> This cell line is a BRCA1 mutant<sup>2</sup> This cell line is a BRCA2 mutant

<sup>3</sup> ATCC, American Type Culture Collection, in most cases via the European Collection of Animal Cell Cultures (ECACC, Porton Down, UK)

Brenton, Dr James Brenton, CRUK CRI, Li Ka Shing Centre, Cambridge, UK

Chaffanet, Dr Max Chaffanet (Departement d'Oncologie Moleculaire, Institute Paoli Calmettes, Marseille)

Lemoine, Prof Nicholas R Lemoine (Centre for Molecular Oncology, Institute of Cancer and the Cancer Research UK Clinical Centre, Barts and The London School of Medicine, London, UK)

O'Hare, Prof Michael J. O'Hare (LICR/UCL Breast Cancer Laboratory, University College, Middlesex Medical School, London, UK)

Orig, from the originator

Sanger, from The Sanger Institute, Hinxton, UK

<sup>4</sup> Media abbreviations: DMEM/F12 - Dulbecco's Modified Eagle Media:F12 nutrient mixture, RPMI-1640 - Roswell Park Memorial Institute Medium 1640
