# Supplementary material for: High-resolution array CGH clarifies events occurring on 8p in carcinogenesis
Source: PubMed Central journal article supplement (PMC2576333; doi:10.1186/1471-2407-8-288), 2008-10-07
Supplement: 1471-2407-8-288-S3.pdf [file 1471-2407-8-288-S3.pdf]

## Primer sequences

EBP49: 5'-GCCAAGATGGACAATCAGGT-3'  
5'-ATGTGGATTTGGGTGACAGC-3'

FGF17: 5'-ACCAGTACGTGAGGGACCAG-3'  
5'-CAAACGTGTCCGTCTCCAC-3'

GAPDH: 5'-GCAAATTCATGGCACCGT-3'  
5'-TCGCCCCACTTGATTTTGG-3'

GFRA2: 5'-AATTGTCGAGCCTCCTACCA-3'  
5'-CATGGGTTCTCGGTGAAGTC-3'

NPM2: 5'-CAGTCAGGAGAGGCGGACT-3'  
5'-TCTTGTCTCCTGGTTTGCT-3'

TUSC3: 5'- GCTGAGCAACTAGCAAAGTGG-3'  
5'- CAAATAAAGCAAACCTCCAACA-3'

XPO7: 5'-TGCAACTGCTCAAGCTCACT-3'  
5'-ATGAAGGAGGGATGGAATGA-3'
