# Supplementary material for: High-resolution array CGH clarifies events occurring on 8p in carcinogenesis
Source: PubMed Central journal article supplement (PMC2576333; doi:10.1186/1471-2407-8-288), 2008-10-07
Supplement: 1471-2407-8-288-S5.pdf [file 1471-2407-8-288-S5.pdf]

**Table 3: Unbalanced rearrangements of 8p found in 30/41 cancer cell lines by array CGH**

| Cell Line  | Distal BAC                                   | Midpoint <sup>1</sup> | Proximal BAC | Midpoint <sup>1</sup>   | Copy no. change <sup>3</sup> |
|------------|----------------------------------------------|-----------------------|--------------|-------------------------|------------------------------|
| BT20       | RP11-419L22                                  | 21.14                 | RP11-582J16  | 22.50                   | amplicon                     |
|            | RP11-322A12                                  | 35.38                 |              | centromere <sup>2</sup> | increase                     |
| CaMa-1     | RP11-794M05                                  | 17.99                 | RP11-452M12  | 18.58                   | increase                     |
|            | RP11-380B11                                  | 36.92                 | RP11-762D20  | 42.33                   | amplicon                     |
|            | RP11-749C07                                  | 42.47                 |              | centromere              | increase                     |
| DU4475     | RP11-784G19                                  | 1.06                  | RP11-439C15  | 1.85                    | decrease                     |
|            | RP11-334K14                                  | 5.85                  | RP11-485I5   | 6.82                    | decrease                     |
|            | RP11-165A17                                  | 15.40                 | RP11-314P10  | 15.59                   | decrease                     |
|            | RP11-67H12                                   | 21.94                 | RP11-364H17  | 23.00                   | decrease                     |
|            | RP11-757J02                                  | 27.84                 | RP11-380I10  | 28.17                   | decrease                     |
| HCC1143    | RP11-331J19                                  | 35.90                 |              | centromere              | increase                     |
| HCC1500    |                                              | telomere              | RP11-784G19  | 1.17                    | increase                     |
|            | RP11-632H17                                  | 36.50                 | RP11-701H6   | 37.99                   | amplicon                     |
|            | RP11-389E22                                  | 38.14                 |              | centromere              | increase                     |
| HCC1569    |                                              | telomere              | RP11-357H1   | 3.68                    | decrease                     |
|            | RP11-72H22                                   | 32.14                 | RP11-65P16   | 33.29                   | increase                     |
|            | RP11-654O09                                  | 34.30                 |              | centromere              | increase                     |
| HCC1599    | RP11-203E08                                  | 24.03                 | RP11-701H6   | 37.99                   | increase                     |
|            | RP11-90P05                                   | 38.16                 |              | centromere              | further increase             |
| HCC1806    | RP11-683E21                                  | 12.62                 | RP11-68C24   | 13.61                   | decrease                     |
|            | RP11-689I12                                  | 14.33                 | RP11-722M19  | 31.48                   | decrease                     |
| HCC1937    | RP11-719N14                                  | 40.07                 |              | centromere              | increase                     |
| HCC1954    | CTD-2172C13                                  | 39.27                 |              | centromere              | increase                     |
| HCC38      | RP11-546K23                                  | 3.40                  | RP11-651E23  | 17.14                   | increase                     |
|            | RP11-608P11                                  | 33.10                 |              | centromere              | increase                     |
| MDA-MB-134 | RP11-459H21                                  | 21.29                 | RP11-600L04  | 22.05                   | amplicon                     |
|            | RP11-221N11                                  | 34.70                 | RP11-749P01  | 40.72                   | amplicon                     |
| MDA-MB-175 | RP11-431A19                                  | 32.28                 | RP11-405D24  | 33.24                   | increase                     |
| MDA-MB-361 |                                              | telomere              | RP11-705G10  | 2.84                    | increase                     |
|            | RP11-597D18                                  | 34.13                 | RP11-221N11  | 34.70                   | further increase             |
|            | RP11-155H15                                  | 34.72                 | RP11-331J19  | 35.90                   | increase                     |
|            | RP11-615C12                                  | 36.00                 |              | centromere              | further increase             |
| MDA-MB-453 | RP11-724C15                                  | 35.59                 |              | centromere              | increase                     |
| PMC42      | RP11-715M14                                  | 2.19                  | RP11-70F13   | 19.84                   | increase                     |
| SUM44      | RP11-68C24                                   | 13.61                 | RP11-50L15   | 14.63                   | increase                     |
|            | RP11-370E21                                  | 36.05                 | RP11-642I24  | 41.88                   | amplicon                     |
| SUM52      | RP11-722M19                                  | 31.48                 |              | centromere              | amplicon                     |
| T47D       | RP11-369C6                                   | 34.67                 | RP11-583G07  | 39.31                   | increase                     |
|            | RP11-769N08                                  | 39.63                 |              | centromere              | increase                     |
| UACC812    | RP11-780J19                                  | 23.90                 | RP11-118I24  | 24.65                   | increase                     |
|            | RP11-350N15                                  | 38.39                 | RP11-290A05  | 42.69                   | increase                     |
| ZR-75-1    | RP11-685I22                                  | 29.15                 | RP11-615M04  | 30.30                   | increase                     |
|            | RP11-764B7                                   | 31.14                 | RP11-72H22   | 32.14                   | decrease                     |
|            | 10 further breakpoints. See Pole et al. 2006 |                       |              |                         |                              |
| ZR-75-30   | RP11-723D22                                  | 38.82                 |              | centromere              | increase                     |
| CaOV3      | RP11-755K01                                  | 29.28                 | RP11-760C14  | 30.06                   | increase                     |
| PA-1       | RP11-45M09                                   | 25.88                 | RP11-722A15  | 26.23                   | decrease                     |
| Capan-1    | RP11-415F24                                  | 24.89                 | RP11-705E05  | 28.02                   | increase                     |
|            | RP11-26K8                                    | 37.18                 | RP11-690P09  | 38.71                   | increase                     |
|            | RP11-104D16                                  | 40.25                 |              | centromere              | increase                     |
| CF-PAC-1   | RP11-431M3                                   | 34.20                 |              | centromere              | increase                     |
| MIA PaCa-2 | RP11-796K11                                  | 1.76                  | RP11-439C15  | 1.85                    | homozygous deletion          |

|         |             |       |             |            |                     |
|---------|-------------|-------|-------------|------------|---------------------|
|         | CTD-2339A14 | 9.74  | RP11-589N15 | 11.72      | homozygous deletion |
|         | RP11-165A17 | 15.40 | RP11-23J14  | 15.72      | increase            |
|         | RP11-222M11 | 19.49 |             | centromere | increase            |
| PancTu1 | RP11-212N14 | 31.58 |             | centromere | increase            |
| RWP-1   | RP11-14D16  | 28.61 | RP11-636F12 | 38.25      | increase            |
|         | RP11-350N15 | 38.39 |             | centromere | further increase    |
| Suit2   | RP11-158M23 | 33.19 | 409I21      | 34.96      | amplification       |
|         | 79H13       | 35.03 |             | centromere | increase            |

<sup>1</sup> Midpoints given are based on NCBI Build 36

<sup>2</sup> Where the rearrangement extends up to or beyond the centromere the most proximal position is given as the centromere.

<sup>3</sup> The copy number change given is relative to the copy number shown for the majority of 8p which may therefore be 1, 2 or more and may or may not reflect the ploidy of the cell line.
